# Supplementary material
Source: publisher figshare collection journal article supplement (https://sage.figshare.com/ndownloader/files/23063354)
Supplement: Supplementary file 1 [file 23063354]

**ONLINE APPENDIX**  
**Appendix A: Variables**

**Table A1. Database Coverage of Donations**

**Panel A. Database Time Coverage\***

| Database | Years covered |
|----------|---------------|
| CSMAR    | 2003–2011     |
| RESSET   | 2000–2006     |
| iFind    | 2008–2012     |

**Panel B. Correction of Donation Expenses between Databases**

| Database | CSMAR     | RESSET | iFind |
|----------|-----------|--------|-------|
| CSMAR    | 1         |        |       |
| RESSET   | 0.9912*** | 1      |       |
| iFind    | 0.9984*** | N/A    | 1     |

**Panel C. Differences in Averages of Donation (in Chinese Yuan) between Databases**

| Database         | Obs.  | Difference | T-test  |
|------------------|-------|------------|---------|
| CSMAR and RESSET | 5,240 | –2,848.447 | –0.2839 |
| CSMAR and iFind  | 5,210 | 328.9381   | 1.1738  |

\*\*\*  $p < .001$ .

\* We obtain donation expenses data from three databases (CSMAR, RESSET, and iFind). Each database covers different periods for firms' donation expenses. The RESSET database is developed by Beijing Gildata RESSET Data Technology and is one of the major databases for listed Chinese firms. The iFind database started in 2010 and is managed by Zhengjiang RoyalFlush Network, which is one of the largest providers of securities analysis software in China.

**Table A2. Geographic Distribution and Culture Index\***

| <b>Nation</b> | <b>Number of<br/>unique directors</b> | <b>WGI<br/>score</b> | <b>PD<br/>index</b> | <b>IM<br/>index</b> | <b>Nation</b> | <b>Number of<br/>unique directors</b> | <b>WGI<br/>score</b> | <b>PD<br/>index</b> | <b>IM<br/>index</b> |
|---------------|---------------------------------------|----------------------|---------------------|---------------------|---------------|---------------------------------------|----------------------|---------------------|---------------------|
| Algeria       | 4                                     | 18                   | N/A                 | N/A                 | South Korea   | 54                                    | 36                   | 60                  | 18                  |
| Argentina     | 3                                     | 24                   | 49                  | 46                  | Macau         | 123                                   | N/A                  | N/A                 | N/A                 |
| Australia     | 232                                   | 60                   | 36                  | 90                  | Malaysia      | 30                                    | 28                   | 100                 | 26                  |
| Austria       | 13                                    | 41                   | N/A                 | N/A                 | Mauritius     | 4                                     | 43                   | N/A                 | N/A                 |
| Belarus       | 1                                     | 25                   | N/A                 | N/A                 | Mexico        | 6                                     | 28                   | 81                  | 30                  |
| Belgium       | 24                                    | 34                   | 65                  | 75                  | Netherlands   | 68                                    | 53                   | 38                  | 80                  |
| Brazil        | 10                                    | 27                   | 69                  | 38                  | New Zealand   | 43                                    | 57                   | 22                  | 79                  |
| Bulgaria      | 1                                     | 15                   | 70                  | 30                  | Norway        | 9                                     | 42                   | 31                  | 69                  |
| Canada        | 301                                   | 58                   | 39                  | 80                  | Philippines   | 15                                    | 45                   | 94                  | 32                  |
| China         | N/A                                   | 13                   | 80                  | 20                  | Poland        | 7                                     | 24                   | 68                  | 60                  |
| Chile         | 1                                     | 38                   | 63                  | 23                  | Portugal      | 1                                     | 19                   | 63                  | 27                  |
| Cuba          | 1                                     | N/A                  | N/A                 | N/A                 | Romania       | 1                                     | 19                   | 90                  | 30                  |
| Czech         | 5                                     | 24                   | 57                  | 58                  | Russia        | 27                                    | 18                   | 93                  | 39                  |
| Denmark       | 10                                    | 49                   | 18                  | 74                  | Singapore     | 217                                   | 20                   | 74                  | 20                  |
| Finland       | 9                                     | 45                   | 33                  | 63                  | South Africa  | 11                                    | 30                   | 49                  | 65                  |
| France        | 136                                   | 34                   | 68                  | 71                  | Spain         | 12                                    | 29                   | 57                  | 51                  |
| Germany       | 179                                   | 38                   | 35                  | 67                  | Sweden        | 27                                    | 38                   | 31                  | 71                  |
| Hong Kong     | 1819                                  | 44                   | 68                  | 25                  | Switzerland   | 53                                    | 44                   | 34                  | 68                  |
| Hungary       | 2                                     | 24                   | 46                  | 80                  | Thailand      | 53                                    | 42                   | 64                  | 20                  |
| India         | 20                                    | 16                   | 77                  | 48                  | UAE           | 6                                     | 38                   | 90                  | 25                  |
| Ireland       | 3                                     | 60                   | 28                  | 70                  | UK            | 525                                   | 51                   | 35                  | 89                  |
| Italy         | 24                                    | 33                   | 50                  | 76                  | Ukraine       | 5                                     | 21                   | N/A                 | N/A                 |
| Japan         | 410                                   | 26                   | 54                  | 46                  | USA           | 1481                                  | 57                   | 40                  | 91                  |
| Jordan        | 2                                     | 21                   | 70                  | 30                  |               |                                       |                      |                     |                     |

\* WGI score refers to World Giving Index, PD index refers to Hofstede's power distance index, and IM index refers to Hofstede's individualism index.

**Table A3. Definitions and Sources of Variables**

| <b>Variable</b>                                                              | <b>Definition</b>                                                                                                                                                                                                                                                                                                                                                                                                                                                                                                                                                                                                                  |
|------------------------------------------------------------------------------|------------------------------------------------------------------------------------------------------------------------------------------------------------------------------------------------------------------------------------------------------------------------------------------------------------------------------------------------------------------------------------------------------------------------------------------------------------------------------------------------------------------------------------------------------------------------------------------------------------------------------------|
| After 2008                                                                   | Dummy variable that equals one for the years after 2008 and 0 otherwise.                                                                                                                                                                                                                                                                                                                                                                                                                                                                                                                                                           |
| Average overseas duration of returnee directors from high-donation countries | Average length of staying abroad for returnee directors from high-donation countries for firms with such directors; it is coded 0 for firms without such directors. This variable is winsorized at the 1st and 99th percentiles. Data are from CSMAR database and manual collection.                                                                                                                                                                                                                                                                                                                                               |
| Block                                                                        | Proportion of shares held by the largest shareholder. This variable is winsorized at the 1st and 99th percentiles. Data are from CSMAR database.                                                                                                                                                                                                                                                                                                                                                                                                                                                                                   |
| Director age                                                                 | Average age of directors for each firm-year, where age is measured by the difference between the year of observation and the year of birth for a director. This variable is winsorized at the 1st and 99th percentiles. Data are from CSMAR database.                                                                                                                                                                                                                                                                                                                                                                              |
| Director tenure                                                              | Average tenure of directors for each firm-year, where tenure is measured as the difference between the year of observation and the year during which a director joins the board of a given firm. This variable is winsorized at the 1st and 99th percentiles. Data are from CSMAR database.                                                                                                                                                                                                                                                                                                                                        |
| Donations-to-profits (%)                                                     | Donation expenses divided by total profits and then multiplied by 100. This variable is measured at the firm-year level. This variable is winsorized at the 1st and 99th percentiles. Data are from the CSMAR, RESSET, and iFind databases.                                                                                                                                                                                                                                                                                                                                                                                        |
| Donations-to-sales (%)                                                       | Donation expenses divided by sales and then multiplied by 100. This variable is winsorized at the 1st and 99th percentiles. Data are from the CSMAR, RESSET and iFind databases.                                                                                                                                                                                                                                                                                                                                                                                                                                                   |
| Effective tax rate                                                           | Ratio of income tax expenses to adjusted total profits. Adjusted total profits is the actual total profits minus the deferred profits, which are the deferred tax divided by the statutory tax rate (Stickney and McGee, 1982). This variable is winsorized at the 1st and 99th percentiles. Data are from the CSMAR database.                                                                                                                                                                                                                                                                                                     |
| Female directors                                                             | Number of female directors divided by number of all directors for each firm-year. It is winsorized at the 1st and 99th percentiles. Data are from the CSMAR database.                                                                                                                                                                                                                                                                                                                                                                                                                                                              |
| Firm age                                                                     | Natural logarithm of total days that firm had operated. This variable is winsorized at the 1st and 99th percentiles. Data are from the CSMAR database.                                                                                                                                                                                                                                                                                                                                                                                                                                                                             |
| Firm size                                                                    | Natural logarithm of total assets. This variable is winsorized at the 1st and 99th percentiles. Data are from the CSMAR database.                                                                                                                                                                                                                                                                                                                                                                                                                                                                                                  |
| Foreign directors                                                            | Number of directors with foreign nationality divided by total number of directors for each firm-year. This variable is winsorized at the 1st and 99th levels. Data are from the CSMAR database and manual collection.                                                                                                                                                                                                                                                                                                                                                                                                              |
| Foreign directors from high-donation countries                               | Number of directors with foreign nationality of high-donation countries divided by the total number of directors for each firm-year. High-donation countries are those foreign countries with WGI scores above the median score of all sample countries. This ratio is set to zero if there are no such directors in the firm. This variable is winsorized at the 1st and 99th percentiles. The WGI database is accessed at <a href="http://www.cafonline.org/docs/default-source/about-us-publications/worldgivingindex2012web.pdf">www.cafonline.org/docs/default-source/about-us-publications/worldgivingindex2012web.pdf</a> . |
| Foreign directors from low-donation countries                                | Number of directors with foreign nationality of low-donation countries divided by the total number of directors for each firm-year. Low-donation countries are those foreign countries with WGI scores equal to or below the median score of all sample countries. This ratio is set to zero if there are no such directors in the firm. This variable is winsorized at the 1st and                                                                                                                                                                                                                                                |

|                                                                        |                                                                                                                                                                                                                                                                                                                                                                                                                                                                                                                                                                                                                                                                                                                                                                              |
|------------------------------------------------------------------------|------------------------------------------------------------------------------------------------------------------------------------------------------------------------------------------------------------------------------------------------------------------------------------------------------------------------------------------------------------------------------------------------------------------------------------------------------------------------------------------------------------------------------------------------------------------------------------------------------------------------------------------------------------------------------------------------------------------------------------------------------------------------------|
|                                                                        | 99th percentiles. The WGI database is accessed at <a href="http://www.cafonline.org/docs/default-source/about-us-publications/worldgivingindex2012web.pdf">www.cafonline.org/docs/default-source/about-us-publications/worldgivingindex2012web.pdf</a> .                                                                                                                                                                                                                                                                                                                                                                                                                                                                                                                     |
| Foreign ownership                                                      | Proportion of shares held by all foreign legal persons. This variable is winsorized at the 1st and 99th percentiles. Data are from the CSMAR database.                                                                                                                                                                                                                                                                                                                                                                                                                                                                                                                                                                                                                       |
| Free cash flow                                                         | Sum of cash flow from operating, financing, and investing activities divided by total assets. This variable is winsorized at the 1st and 99th percentiles. Data are from the CSMAR database.                                                                                                                                                                                                                                                                                                                                                                                                                                                                                                                                                                                 |
| Insider directors                                                      | Number of directors who receive salary as an employee of the firm divided by total number of directors for each firm-year. This variable is winsorized at the 1st and 99th percentiles. Data are from the CSMAR database.                                                                                                                                                                                                                                                                                                                                                                                                                                                                                                                                                    |
| Leverage                                                               | Number of total liabilities divided by total assets. This variable is winsorized at the 1st and 99th percentiles. Data are from the CSMAR database.                                                                                                                                                                                                                                                                                                                                                                                                                                                                                                                                                                                                                          |
| Long-term foreign directors from high-donation countries               | Number of long-term foreign directors from high-donation countries divided by the number of foreign directors from high-donation countries, where a foreign director is defined as long-term if she has been on the board of any listed Chinese firms for more than a year. This ratio is set to zero if there are no such foreign directors in the firm. This variable is winsorized at the 1st and 99th percentiles.                                                                                                                                                                                                                                                                                                                                                       |
| MB                                                                     | Market-to-book ratio. It is the sum of the market value of equity and book value of total liabilities, divided by the book value of total assets. This variable is winsorized at the 1st and 99th percentiles. Data are from the CSMAR database.                                                                                                                                                                                                                                                                                                                                                                                                                                                                                                                             |
| Per capita GDP                                                         | Provincial gross domestic product (GDP) divided by population for each province-year. This variable is denominated in thousand Chinese yuan. Data are from the CSMAR database.                                                                                                                                                                                                                                                                                                                                                                                                                                                                                                                                                                                               |
| Politically connected local directors                                  | Number of local directors (i.e., Chinese directors with no foreign experience) and politically connected directors divided by the total number of directors on the board for each firm-year. Political connectedness is defined as being current or former members of the People's Congress or the Chinese People's Political Consultative Conference or Government Counselors for each firm-year. This variable is winsorized at the 1st and 99th percentiles. Data are from the CSMAR database and manual collection.                                                                                                                                                                                                                                                      |
| Provincial policy                                                      | Dummy variable that equals one for firms in the province after it starts policies attracting returnees; otherwise, it equals zero.                                                                                                                                                                                                                                                                                                                                                                                                                                                                                                                                                                                                                                           |
| Returnee directors                                                     | Number of returnee directors on the board divided by the total number of directors for each firm-year. This variable is winsorized at the 1st and 99th percentiles. Data are from the CSMAR database and manual collection.                                                                                                                                                                                                                                                                                                                                                                                                                                                                                                                                                  |
| Returnee directors from high-donation countries                        | Number of returnee directors coming back from high-donation countries divided by the total number of directors for each firm-year. High-donation countries are those foreign countries with WGI scores above the median score of all sample countries. This ratio is set to zero if there are no returnee directors in the firm. If a returnee director has stayed in multiple foreign countries, her WGI score is the average score across all those foreign countries. This variable is winsorized at the 1st and 99th percentiles. The WGI database is accessed at <a href="http://www.cafonline.org/docs/default-source/about-us-publications/worldgivingindex2012web.pdf">www.cafonline.org/docs/default-source/about-us-publications/worldgivingindex2012web.pdf</a> . |
| Returnee directors from high-donation countries and on multiple boards | Number of interlocked returnee directors from high-donation countries divided by the total number of board members, where a returnee director is defined as interlocked if she serves on multiple boards in a given year. This variable is winsorized at the 1st and 99th percentiles.                                                                                                                                                                                                                                                                                                                                                                                                                                                                                       |

|                                                       |                                                                                                                                                                                                                                                                                                                                                                                                                                                                                                                                                                                                                                                                                                                                                                                        |
|-------------------------------------------------------|----------------------------------------------------------------------------------------------------------------------------------------------------------------------------------------------------------------------------------------------------------------------------------------------------------------------------------------------------------------------------------------------------------------------------------------------------------------------------------------------------------------------------------------------------------------------------------------------------------------------------------------------------------------------------------------------------------------------------------------------------------------------------------------|
| Returnee directors from low-donation countries        | Number of returnee directors coming back from low-donation countries divided by the total number of directors for each firm-year. Low-donation countries are those foreign countries with WGI scores equal to or below the median score of all sample countries. This ratio is set to zero if there are no returnee directors in the firm. If a returnee director has stayed in multiple foreign countries, her WGI score is the average score across all those foreign countries. This variable is winsorized at the 1st and 99th percentiles. The WGI database is accessed at <a href="http://www.cafonline.org/docs/default-source/about-us-publications/worldgivingindex2012web.pdf">www.cafonline.org/docs/default-source/about-us-publications/worldgivingindex2012web.pdf</a> . |
| Returnee directors from high power distance countries | Number of returnee directors coming back from high power distance countries divided by the total number of directors for each firm-year. High power distance countries are those foreign countries whose power distance scores are higher than the median score of all sample countries. If a returnee director has stayed in multiple foreign countries, her power distance score is the average power distance score across all those foreign countries. Data are from Geert Hofstede's official website, <a href="https://geerthofstede.com/research-and-vsm/dimension-data-matrix/">https://geerthofstede.com/research-and-vsm/dimension-data-matrix/</a> .                                                                                                                        |
| Returnee directors from low power distance countries  | Number of returnee directors coming back from low power distance countries divided by the total number of directors for each firm-year. Low power distance countries are those foreign countries whose power distance scores equal to or are lower than the median score of all sample countries. If a returnee director has stayed in multiple foreign countries, her power distance score is the average power distance score across all those foreign countries. Data are from Geert Hofstede's official website, <a href="https://geerthofstede.com/research-and-vsm/dimension-data-matrix/">https://geerthofstede.com/research-and-vsm/dimension-data-matrix/</a> .                                                                                                               |
| Returnee directors from high individualism countries  | Number of returnee directors coming back from high individualism countries divided by the total number of directors for each firm-year. High individualism countries are those foreign countries whose individualism scores are higher than the median score of all sample countries. If a returnee director has stayed in multiple foreign countries, her individualism score is the average power distance score across all those foreign countries. Data are from Geert Hofstede's official website, <a href="https://geerthofstede.com/research-and-vsm/dimension-data-matrix/">https://geerthofstede.com/research-and-vsm/dimension-data-matrix/</a> .                                                                                                                            |
| Returnee directors from low individualism countries   | Number of returnee directors coming back from low individualism countries divided by the total number of directors for each firm-year. Low individualism countries are those foreign countries whose individualism scores equal to or are lower than the median score of all sample countries. If a returnee director has stayed in multiple foreign countries, her individualism score is the average power distance score across all those foreign countries. Data are from Geert Hofstede's official website, <a href="https://geerthofstede.com/research-and-vsm/dimension-data-matrix/">https://geerthofstede.com/research-and-vsm/dimension-data-matrix/</a> .                                                                                                                   |
| ROA                                                   | Firm's operating income divided by total assets. This variable is winsorized at the 1st and 99th percentiles. Data are from the CSMAR database.                                                                                                                                                                                                                                                                                                                                                                                                                                                                                                                                                                                                                                        |
| State owned                                           | Dummy variable that equals one if the largest ultimate shareholder of the firm is marked in the database as "State-owned" or "State-controlled." Data are from the CSMAR database.                                                                                                                                                                                                                                                                                                                                                                                                                                                                                                                                                                                                     |

## REFERENCE

Stickney, C. P., and V. E. McGee  
1982 "Effective corporate tax rates: The effect of size, capital intensity, leverage and other factors."  
Journal of Accounting and Public Policy, 1: 125–152.

**Table A4. Policies for Attracting Highly Skilled Returnees, 2000–2012\***

| Province       | Year policy adopted | # of unique firms | # of firm-year observations |        |       | % of firms with returnee directors |       |
|----------------|---------------------|-------------------|-----------------------------|--------|-------|------------------------------------|-------|
|                |                     |                   | Total                       | Before | After | Before                             | After |
| Anhui          | 1994                | 77                | 638                         | 0      | 638   | N/A                                | 50.78 |
| Beijing        | 2000                | 210               | 1483                        | 61     | 1422  | 34.43                              | 66.67 |
| Chongqing      | 2005                | 36                | 340                         | 139    | 201   | 38.85                              | 67.66 |
| Fujian         | 2000                | 85                | 652                         | 30     | 622   | 26.67                              | 62.70 |
| Gansu          | 2003                | 25                | 241                         | 57     | 184   | 10.53                              | 32.61 |
| Guangdong      | 1999                | 361               | 2468                        | 0      | 2468  | N/A                                | 77.23 |
| Guangxi        | 2005                | 29                | 290                         | 113    | 177   | 40.71                              | 58.19 |
| Guizhou        | 2003                | 21                | 214                         | 46     | 168   | 17.39                              | 33.93 |
| Hainan         | 2001                | 26                | 270                         | 37     | 233   | 51.35                              | 47.64 |
| Hebei          | 2001                | 50                | 435                         | 43     | 392   | 6.98                               | 43.62 |
| Heilongjiang   | 2002                | 31                | 330                         | 65     | 265   | 30.77                              | 48.68 |
| Henan          | 1992                | 67                | 502                         | 0      | 502   | N/A                                | 51.39 |
| Hubei          | 2002                | 80                | 787                         | 149    | 638   | 30.87                              | 57.37 |
| Hunan          | 2001                | 72                | 579                         | 57     | 522   | 14.04                              | 59.96 |
| Inner Mongolia | 2001                | 25                | 241                         | 30     | 211   | 10.00                              | 37.91 |
| Jiangsu        | 2004                | 231               | 1479                        | 350    | 1129  | 42.00                              | 58.46 |
| Jiangxi        | 2003                | 34                | 322                         | 71     | 251   | 36.62                              | 51.00 |
| Jilin          | 2001                | 40                | 408                         | 52     | 356   | 11.54                              | 45.79 |
| Liaoning       | 1999                | 68                | 628                         | 0      | 628   | N/A                                | 39.33 |
| Ningxia        | 2003                | 12                | 142                         | 40     | 102   | 37.50                              | 35.29 |
| Qinghai        | 1999                | 11                | 121                         | 0      | 121   | N/A                                | 46.28 |
| Shaanxi        | 1995                | 37                | 343                         | 0      | 343   | N/A                                | 72.30 |
| Shandong       | 2005                | 154               | 1167                        | 393    | 774   | 40.71                              | 56.72 |
| Shanghai       | 2005                | 196               | 1855                        | 751    | 1104  | 53.66                              | 70.02 |
| Shanxi         | 2007                | 33                | 346                         | 192    | 154   | 43.75                              | 49.35 |
| Sichuan        | 2005                | 91                | 814                         | 314    | 500   | 33.76                              | 54.20 |
| Tianjin        | 2001                | 38                | 363                         | 39     | 324   | 30.77                              | 68.52 |
| Tibet          | N/A                 | 10                | 103                         | N/A    | N/A   | N/A                                | N/A   |
| Xinjiang       | 2003                | 38                | 367                         | 85     | 282   | 24.71                              | 26.24 |
| Yunnan         | 2001                | 28                | 287                         | 32     | 255   | 21.88                              | 51.37 |
| Zhejiang       | 2001                | 245               | 1587                        | 115    | 1472  | 24.35                              | 64.27 |
| Total          |                     | 2461              | 19802                       | 3261   | 16438 | 38.55                              | 59.75 |

\* This table reports the year of the policy adoption, the number of unique sample firms, and the proportion of returnee directors for each province that implemented a policy to attract highly talented emigrants. “Issuing year” is the year when the policy was adopted. “After” refers to the number of observations after the issuing year. “Before” refers to observations before and during the issuing year. “% of firms with returnee directors” refers to the fraction of firms with at least one returnee director in the corresponding firm-year observations.

## Appendix B: Results

**Table B1. Correlation of Variables**

| Variable                                                                          | (1)  | (2)  | (3)  | (4)  | (5)  | (6)  | (7)  | (8)  | (9)  | (10) | (11) | (12) | (13) | (14) | (15) |
|-----------------------------------------------------------------------------------|------|------|------|------|------|------|------|------|------|------|------|------|------|------|------|
| (2) Donations-to-profits (%) (adjusted by industry-year median)                   | .48  |      |      |      |      |      |      |      |      |      |      |      |      |      |      |
| (3) Returnee directors from high-donation countries                               | .02  | .01  |      |      |      |      |      |      |      |      |      |      |      |      |      |
| (4) Returnee directors from low-donation countries                                | -.01 | -.00 | .04  |      |      |      |      |      |      |      |      |      |      |      |      |
| (5) Foreign directors from high-donation countries                                | .00  | -.01 | .24  | .03  |      |      |      |      |      |      |      |      |      |      |      |
| (6) Foreign directors from low-donation countries                                 | -.00 | .01  | .12  | .25  | .18  |      |      |      |      |      |      |      |      |      |      |
| (7) Foreign ownership                                                             | -.01 | .00  | .20  | .12  | .24  | .19  |      |      |      |      |      |      |      |      |      |
| (8) Block                                                                         | -.05 | -.05 | -.04 | -.01 | -.02 | -.03 | .01  |      |      |      |      |      |      |      |      |
| (9) State owned                                                                   | -.07 | -.01 | -.14 | -.04 | -.10 | -.07 | -.10 | .28  |      |      |      |      |      |      |      |
| (10) Firm size                                                                    | -.02 | .02  | .10  | .03  | -.00 | .01  | -.01 | .21  | .10  |      |      |      |      |      |      |
| (11) Firm age                                                                     | -.01 | .02  | .02  | -.02 | -.02 | -.02 | -.10 | -.32 | -.16 | .14  |      |      |      |      |      |
| (12) ROA                                                                          | .08  | .00  | .06  | .03  | .05  | .02  | .04  | .16  | -.01 | .19  | -.15 |      |      |      |      |
| (13) MB                                                                           | .05  | -.06 | .00  | -.02 | .02  | -.01 | .01  | -.07 | -.11 | -.43 | -.04 | -.03 |      |      |      |
| (14) Leverage                                                                     | -.08 | -.01 | -.04 | -.03 | -.08 | -.03 | -.08 | -.08 | .03  | .10  | .25  | -.51 | .09  |      |      |
| (15) Free cash flow                                                               | .03  | -.02 | .04  | .01  | .06  | .00  | .05  | -.00 | -.06 | -.05 | -.12 | .16  | .15  | -.14 |      |
| (16) Female directors                                                             | .03  | .01  | -.01 | -.02 | .02  | .00  | .03  | -.07 | -.13 | -.11 | .05  | -.01 | .03  | -.02 | .03  |
| (17) Director age                                                                 | -.03 | .01  | .03  | .05  | .06  | .07  | .05  | .10  | .04  | .31  | .13  | .07  | -.10 | -.02 | -.04 |
| (18) Director tenure                                                              | .01  | .00  | .02  | -.01 | .00  | -.01 | -.02 | -.01 | -.09 | .09  | .06  | .04  | -.05 | -.04 | -.01 |
| (19) Insider directors                                                            | .08  | .02  | -.04 | -.04 | .02  | .01  | -.02 | -.06 | -.12 | -.07 | -.11 | .06  | .01  | -.09 | .04  |
| (20) Average overseas duration of returnee directors from high-donation countries | -.01 | .01  | .37  | .03  | .11  | .07  | .09  | -.02 | -.04 | .10  | .05  | .03  | -.02 | -.01 | .00  |
| (21) Returnee directors from high-donation countries and on multiple boards       | .02  | .01  | .50  | .03  | .04  | .02  | .04  | .01  | -.03 | .12  | .04  | .05  | -.04 | -.02 | -.00 |
| (22) Politically connected local directors                                        | .10  | .06  | .03  | -.01 | .03  | .02  | .00  | -.04 | -.15 | .05  | .02  | .06  | -.01 | -.02 | .03  |
| (23) Per capita GDP                                                               | .02  | .00  | .20  | .07  | .10  | .04  | .06  | -.06 | -.31 | .18  | .24  | .07  | .00  | -.09 | .04  |
| (24) After 2008                                                                   | .04  | -.01 | .11  | .03  | .11  | .04  | .01  | -.12 | -.44 | .17  | .29  | .06  | .09  | -.09 | .09  |
| (25) Long-term foreign directors from high-donation countries                     | .00  | .00  | .19  | .01  | .74  | .16  | .16  | -.02 | -.08 | .01  | .00  | .04  | .00  | -.05 | -.03 |
| (26) Effective tax rate                                                           | .00  | .01  | -.00 | -.00 | -.01 | -.00 | -.01 | .05  | .04  | .04  | -.03 | .15  | -.06 | -.04 | .01  |
| (27) Returnee directors from low power distance countries                         | .02  | .02  | .77  | .34  | .20  | .18  | .17  | -.05 | -.13 | .09  | .01  | .07  | -.01 | -.05 | .04  |
| (28) Returnee directors from high power distance countries                        | -.00 | -.02 | .61  | .25  | .15  | .11  | .18  | .00  | -.07 | .06  | .01  | .03  | -.00 | -.02 | .02  |
| (29) Returnee directors from high individualism countries                         | .03  | .02  | .78  | .15  | .19  | .10  | .14  | -.04 | -.11 | .10  | .01  | .06  | .00  | -.04 | .03  |
| (30) Returnee directors from low individualism countries                          | .00  | -.01 | .63  | .46  | .16  | .21  | .21  | -.02 | -.10 | .05  | .00  | .04  | -.01 | -.03 | .02  |
| Variable                                                                          | (16) | (17) | (18) | (19) | (20) | (21) | (22) | (23) | (24) | (25) | (26) | (27) | (28) | (29) | (30) |
| (17) Director age                                                                 | -.08 |      |      |      |      |      |      |      |      |      |      |      |      |      |      |
| (18) Director tenure                                                              | .04  | .13  |      |      |      |      |      |      |      |      |      |      |      |      |      |
| (19) Insider directors                                                            | .07  | -.12 | .02  |      |      |      |      |      |      |      |      |      |      |      |      |
| (20) Average overseas duration of returnee directors from high-donation countries | -.05 | .07  | .01  | -.04 |      |      |      |      |      |      |      |      |      |      |      |
| (21) Returnee directors from high-donation countries and on multiple boards       | -.05 | .04  | .03  | -.06 | .23  |      |      |      |      |      |      |      |      |      |      |
| (22) Politically connected local directors                                        | .04  | .09  | .04  | .06  | .03  | -.01 |      |      |      |      |      |      |      |      |      |
| (23) Per capita GDP                                                               | .11  | .27  | .16  | -.08 | .10  | .14  | .09  |      |      |      |      |      |      |      |      |
| (24) After 2008                                                                   | .11  | .24  | .20  | .03  | .04  | .07  | .15  | .55  |      |      |      |      |      |      |      |
| (25) Long-term foreign directors from high-donation countries                     | .01  | .06  | .00  | .03  | .09  | .04  | .02  | .07  | .07  |      |      |      |      |      |      |
| (26) Effective tax rate                                                           | .01  | -.01 | -.02 | .02  | -.00 | -.00 | .00  | -.05 | -.06 | -.01 |      |      |      |      |      |
| (27) Returnee directors from low power distance countries                         | -.02 | .03  | .01  | -.03 | .35  | .43  | .04  | .17  | .11  | .15  | .00  |      |      |      |      |
| (28) Returnee directors from high power distance countries                        | -.00 | .03  | .00  | -.04 | .15  | .24  | -.02 | .14  | .05  | .11  | -.01 | .11  |      |      |      |
| (29) Returnee directors from high individualism countries                         | -.02 | .03  | .02  | -.03 | .37  | .45  | .04  | .16  | .10  | .14  | .00  | .88  | .17  |      |      |
| (30) Returnee directors from low individualism countries                          | -.01 | .03  | -.00 | -.05 | .16  | .25  | -.01 | .16  | .07  | .13  | -.01 | .36  | .83  | .14  |      |

**Table B2. IV First Stage**

|                                                   | (1)<br>Returnee directors<br>from high-donation<br>countries | (2)<br>Returnee directors<br>from low-donation<br>countries | (3)<br>All returnee<br>directors |
|---------------------------------------------------|--------------------------------------------------------------|-------------------------------------------------------------|----------------------------------|
| Provincial policy                                 | .0242**<br>(.0086)                                           | .0028<br>(.0035)                                            | .0270**<br>(.0095)               |
| Provincial policy × Foreign ownership             | .0442<br>(.0857)                                             | .0343<br>(.0330)                                            | .0785<br>(.1023)                 |
| Provincial policy × Block                         | −.0165<br>(.0152)                                            | −.0013<br>(.0071)                                           | −.0179<br>(.0167)                |
| Provincial policy × State owned                   | −.0012<br>(.0064)                                            | .0003<br>(.0026)                                            | −.0008<br>(.0070)                |
| Foreign ownership                                 | .1402***<br>(.0348)                                          | .0160<br>(.0175)                                            | .1562***<br>(.0400)              |
| Block                                             | −.0082<br>(.0148)                                            | −.0075<br>(.0063)                                           | −.0157<br>(.0158)                |
| State owned                                       | .0006<br>(.0032)                                             | .0023+<br>(.0013)                                           | .0029<br>(.0033)                 |
| Firm size                                         | .0020<br>(.0024)                                             | −.0002<br>(.0010)                                           | .0018<br>(.0027)                 |
| Firm age                                          | .0277***<br>(.0043)                                          | .0025<br>(.0020)                                            | .0302***<br>(.0049)              |
| ROA                                               | .0314*<br>(.0126)                                            | .0074<br>(.0056)                                            | .0388**<br>(.0140)               |
| MB                                                | −.0012*<br>(.0006)                                           | −.0004*<br>(.0002)                                          | −.0017**<br>(.0006)              |
| Leverage                                          | .0078<br>(.0065)                                             | .0030+<br>(.0018)                                           | .0108<br>(.0068)                 |
| Free cash flow                                    | .0053<br>(.0034)                                             | −.0019<br>(.0016)                                           | .0034<br>(.0038)                 |
| Female directors                                  | −.0138<br>(.0143)                                            | −.0054<br>(.0066)                                           | −.0191<br>(.0153)                |
| Director age                                      | −.0014**<br>(.0005)                                          | −.0001<br>(.0002)                                           | −.0027**<br>(.0009)              |
| Director tenure                                   | −.0019*<br>(.0009)                                           | −.0008*<br>(.0004)                                          | −.0015**<br>(.0005)              |
| Insider directors                                 | −.0287***<br>(.0062)                                         | −.0041<br>(.0026)                                           | −.0328***<br>(.0068)             |
| Foreign directors from high-donation<br>countries | .7593***<br>(.0996)                                          | .0137<br>(.0367)                                            | .7730***<br>(.1096)              |
| Foreign directors from low-donation<br>countries  | .5309***<br>(.1062)                                          | .2677***<br>(.0672)                                         | .7987***<br>(.1286)              |
| Intercept                                         | −.1113*<br>(.0472)                                           | .0084<br>(.0223)                                            | −.1029*<br>(.0515)               |
| <b>Joint F test of excluded instruments</b>       | <b>6.45***</b>                                               | <b>1.18</b>                                                 | <b>7.45***</b>                   |
| # of observations                                 | 19,047                                                       | 19,047                                                      | 19,047                           |
| # of firms                                        | 2,387                                                        | 2,387                                                       | 2,387                            |
| R-squared                                         | .743                                                         | .657                                                        | .743                             |
| Controls                                          | Yes                                                          | Yes                                                         | Yes                              |
| Firm fixed effects                                | Yes                                                          | Yes                                                         | Yes                              |

+  $p < .10$ ; \*  $p < .05$ ; \*\*  $p < .01$ ; \*\*\*  $p < .001$ .



**Table B3. Female Directors/Female Returnee Directors as Alliance Partners\***

|                                                                               | (1)<br>Female directors        | (2)<br>Female returnee<br>directors |
|-------------------------------------------------------------------------------|--------------------------------|-------------------------------------|
| Returnee director from high-donation countries                                | .3668 <sup>•</sup><br>(.1458)  | .3863 <sup>••</sup><br>(.1361)      |
| Returnee director from high-donation countries<br>× Female director           | .2036<br>(.3495)               |                                     |
| Female director                                                               | .0007<br>(.0284)               | .0442 <sup>••</sup><br>(.0167)      |
| Returnee director from high-donation countries<br>× Female returnee directors |                                | -.3193<br>(1.0657)                  |
| Female returnee directors                                                     |                                | -.2575<br>(.2519)                   |
| Returnee director from low-donation countries                                 | .0346<br>(.0251)               | .0626 <sup>+</sup><br>(.0323)       |
| Foreign director from high-donation countries                                 | -.3171 <sup>•</sup><br>(.1283) | -.2843 <sup>•</sup><br>(.1169)      |
| Foreign director from low-donation countries                                  | -.1788 <sup>+</sup><br>(.1003) | -.1619 <sup>+</sup><br>(.0937)      |
| Partial R-squared                                                             | .008                           | .006                                |
| Cragg-Donald Wald F statistic                                                 | 13.042                         | 12.277                              |
| 5% maximal IV relative bias                                                   | 17.70                          | 15.18                               |
| 10% maximal IV relative bias                                                  | 10.22                          | 9.01                                |
| # of observations                                                             | 18,860                         | 18,860                              |
| # of firms                                                                    | 2,240                          | 2,240                               |
| Controls                                                                      | Yes                            | Yes                                 |
| Firm fixed effects                                                            | Yes                            | Yes                                 |

+  $p < .10$ ; <sup>•</sup>  $p < .05$ ; <sup>••</sup>  $p < .01$ ; <sup>•••</sup>  $p < .001$ .

\* Dependent variables are measured at the firm-year level. 2SLS estimates. Standard errors clustered at the firm level are shown in parentheses. All models include a constant, the coefficients of which are not reported.
